## **Corrigendum: Water Quality Research Journal 54(4), 326–337: Manganese removal processes at 10 groundwater fed full-scale drinking water treatment plants**

I. L. Breda, L. Ramsay, D. A. Søborg, R. Dimitrova and P. Roslev

<https://doi.org/10.2166/wqrj.2019.006>

The authors regret that the Acknowledgements section was incorrect in their original paper and apologise for any inconvenience caused. The corrected Acknowledgements section for this paper can be found here:

---

### **ACKNOWLEDGEMENTS**

This work was financed by Skanderborg Forsyningsvirksomhed A/S, Innovationsfonden (5016-00134B). Technicians at Aarhus Water and VandCenter Syd are acknowledged for assistance during sampling. Kirsten L. Thomsen from VIA University College (Horsens), Helle Blendstrup, Lotte Trillingsgaard and Edmundas Maksimavicius from Aalborg University are acknowledged for technical assistance. This paper is part of a project that has received funding from the European Union's Horizon 2020 research and innovation programme under the Marie Skłodowska-Curie grant agreement No 765860 (MSCA support to AQUALity ESR Reni Dimitrova). Finally, the MUDP project 'Smart Redesign of Drinking Water Production' is acknowledged for supplying data.
